# Supplementary material for: Columnar neurons support saccadic bar tracking in Drosophila
Source: eLife journal article supplement (doi:10.7554/elife.83656), 2023-04-04
Supplement: supp [file elife-83656-supp-v1.zip]

**Figure 1-figure supplement 1**

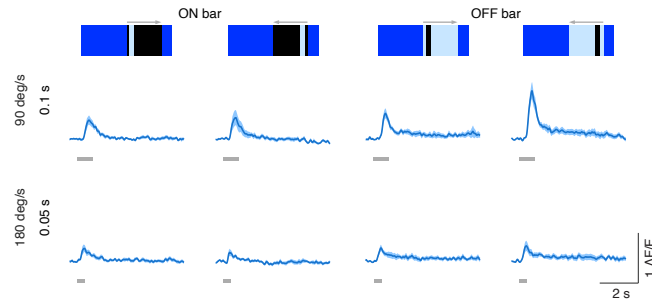

**Figure 1-figure supplement 1.** Speed sensitivity of T3 neurons. Average responses (mean  $\pm$  s.e.m.) of T3 neurons to ON and OFF solid bars ( $9^\circ \times 72^\circ$ , width  $\times$  height) moving in two different directions (front-to-back and back-to-front) at two different speeds. Visual stimuli are depicted at the top. Light gray horizontal bars at the bottom indicate stimulus presentation ( $n = 11$  flies, 3 repetitions per fly).
