# Supplementary material for: Columnar neurons support saccadic bar tracking in Drosophila
Source: eLife journal article supplement (doi:10.7554/elife.83656), 2023-04-04
Supplement: supp [file elife-83656-supp-v1.zip]

Archive with 21 entries (21 files):
- elife_poa_e83656_Video_1.mp4
- elife_poa_e83656_Video_2.mp4
- elife_poa_e83656_Video_3.mp4
- elife_poa_e83656_Video_4.mp4
- elife_poa_e83656_Figure_1_figure_supplement_1.pdf
- elife_poa_e83656_Figure_2_figure_supplement_1.pdf
- elife_poa_e83656_Figure_2_figure_supplement_2.pdf
- elife_poa_e83656_Figure_3_figure_supplement_1.pdf
- elife_poa_e83656_Figure_3_figure_supplement_2.pdf
- elife_poa_e83656_Figure_3_figure_supplement_3.pdf
- elife_poa_e83656_Figure_4_figure_supplement_1.pdf
- elife_poa_e83656_Figure_4_figure_supplement_2.pdf
- elife_poa_e83656_Figure_4_figure_supplement_3.pdf
- elife_poa_e83656_Figure_4_figure_supplement_4.pdf
- elife_poa_e83656_Figure_5_figure_supplement_1.pdf
- elife_poa_e83656_Figure_5_figure_supplement_2.pdf
- elife_poa_e83656_Figure_5_figure_supplement_3.pdf
- elife_poa_e83656_Figure_6_figure_supplement_1.pdf
- elife_poa_e83656_Figure_6_figure_supplement_2.pdf
- elife_poa_e83656_Figure_6_figure_supplement_3.pdf
- elife_poa_e83656_Figure_7_figure_supplement_1.pdf
