# Supplementary material for: Columnar neurons support saccadic bar tracking in Drosophila
Source: eLife journal article supplement (doi:10.7554/elife.83656), 2023-04-04
Supplement: supp [file elife-83656-supp-v1.zip › elife_poa_e83656_Figure_2_figure_supplement_1.pdf]

**Figure 2-figure supplement 1**

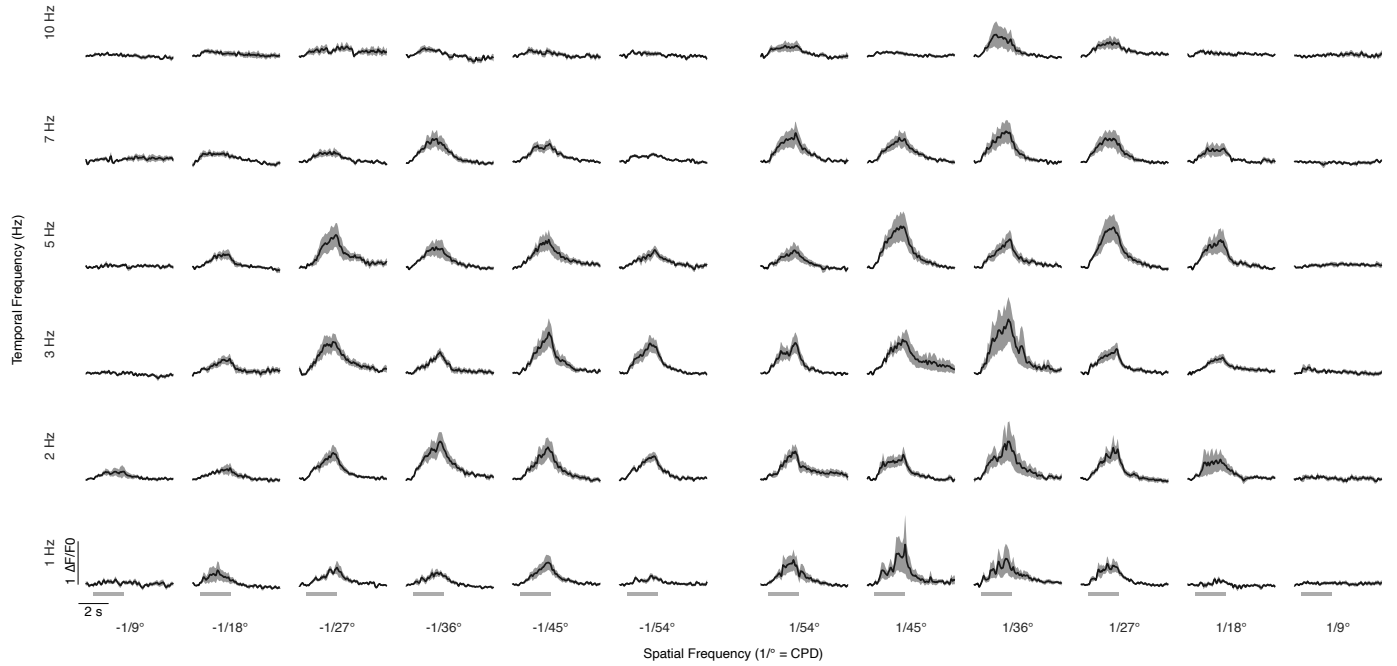

**Figure 2-figure supplement 1.** Spatiotemporal responses of T3 neurons. Average calcium responses (mean  $\pm$  s.e.m.) to square-wave moving gratings in a single T3 neuron expressing jGCaMP7f ( $n = 10$  flies, 1 repetition per fly). The time-series responses are based on the combinations of six different temporal frequencies (rows) and six different spatial frequencies (columns). Negative spatial frequencies refer to back-to-front whereas positive values refer to front-to-back moving gratings. Light gray horizontal bars at the bottom indicate stimulus presentation.
