# Supplementary material for: Columnar neurons support saccadic bar tracking in Drosophila
Source: eLife journal article supplement (doi:10.7554/elife.83656), 2023-04-04
Supplement: supp [file elife-83656-supp-v1.zip › elife_poa_e83656_Figure_3_figure_supplement_1.pdf]

### Figure 3-figure supplement 1

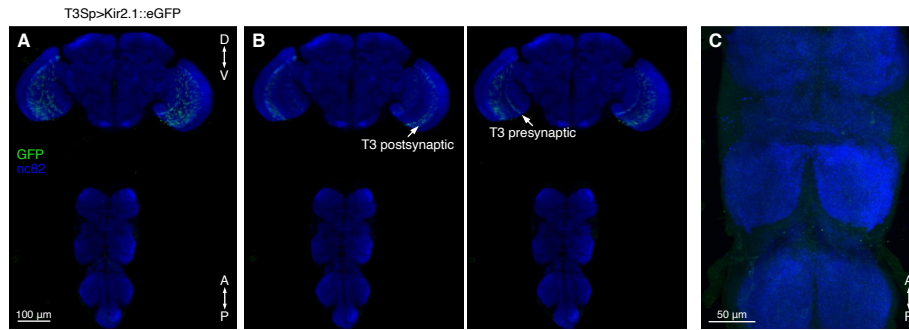

**Figure 3-figure supplement 1.** Expression pattern of T3 neurons. **(A)** Maximum intensity projection (MIP) of confocal stack with 10x objective. Brain and VNC from a fly expressing Kir2.1 tagged with GFP under the control of T3 split-Gal4 are shown. **(B)** Left: single plane (for GFP) showing T3 dendrites innervating layer 9 of the medulla (MIP for nc82). Right: single plane showing the presynaptic terminals innervating layer 2 and 3 of the lobula. **(C)** Maximum intensity projection of confocal stack with 40x objective. No GFP expression is evident in the VNC.
