# Supplementary material for: Columnar neurons support saccadic bar tracking in Drosophila
Source: eLife journal article supplement (doi:10.7554/elife.83656), 2023-04-04
Supplement: supp [file elife-83656-supp-v1.zip › elife_poa_e83656_Figure_3_figure_supplement_3.pdf]

**Figure 3-figure supplement 3**

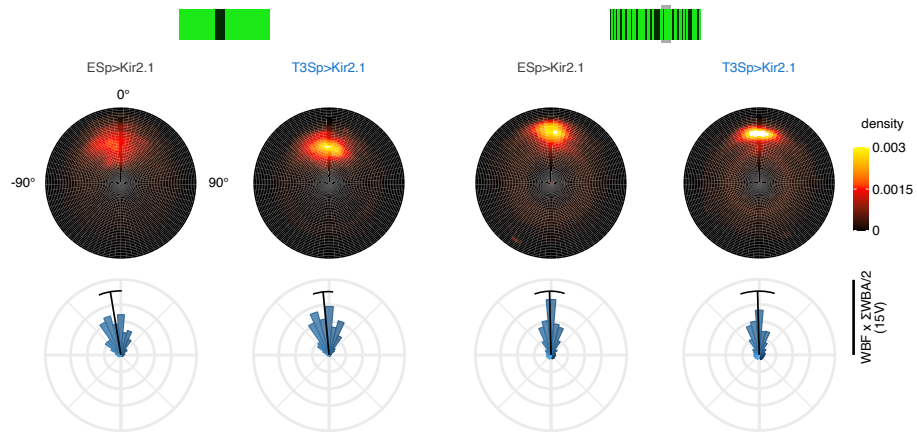

**Figure 3-figure supplement 3.** Silencing of T3 does not affect frontal bar fixation in rigid closed-loop. Left: closed-loop fixation of a dark bar on a bright background over 60 s in EmptySp>Kir2.1 (n = 28) and T3Sp>Kir2.1 flies (n = 26). At the top, polar heatmaps of the heading where the eccentricity of the polar map represents the forward velocity (computed as  $WBF \times \Sigma WBA/2$ ). If the flies did not fly during the experiment, a blob of high density would have been confined at the center of the polar map with a strong peak at 0°, while if the flies flew at the highest velocity and spinning around during the entire experiment, a blob of high density would have been distributed around the edge of the polar map. At the bottom, polar distribution of the heading with the solid black line representing the mean with 95% bootstrap confidence interval. Each bin corresponds to 10°. Right: closed-loop fixation of a motion-defined bar on a similar textured background. Graph features are the same as on the left.
