# Supplementary material for: Columnar neurons support saccadic bar tracking in Drosophila
Source: eLife journal article supplement (doi:10.7554/elife.83656), 2023-04-04
Supplement: supp [file elife-83656-supp-v1.zip › elife_poa_e83656_Figure_4_figure_supplement_2.pdf]

**Figure 4-figure supplement 2**

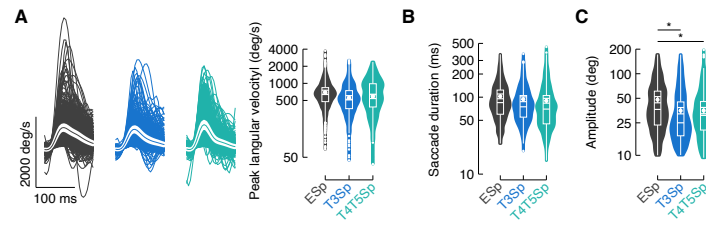

**Figure 4-figure supplement 2.** Saccade dynamics during bar tracking. **(A)** Left: average time-series of the angular velocity in the three genotypes. Thin lines represent single saccades. Thick line represents the mean and the white shade around the mean represents s.e.m. Right: violin-box plots of the peak angular velocity during saccades (y-axis is on a log scale). A generalized linear mixed model was used to fit the data (residuals were fitted with a gamma distribution and a log link function) and pairwise post-hoc comparisons using *t*-tests adjusted with Bonferroni method were used to compare the levels of the fixed effects (EmptySp vs T3Sp,  $p = .23$ , Cohen's  $d = .43$ ; EmptySp vs T4/T5Sp,  $p = .56$ , Cohen's  $d = .32$ ; T3Sp vs T4/T5Sp,  $p = 1$ , Cohen's  $d = -.11$ ). Graph features are as in **Figure 4C**. **(B)** Violin-box plots of saccade duration (EmptySp vs T3Sp,  $p = 1$ , Cohen's  $d = .17$ ; EmptySp vs T4/T5Sp,  $p = .58$ , Cohen's  $d = .26$ ; T3Sp vs T4/T5Sp  $p = 1$ , Cohen's  $d = .09$ ). Graph features and statistical approach are as in **(A)**. **(C)** Violin-box plots of saccade amplitude (EmptySp vs T3Sp,  $p = .04$ , Cohen's  $d = .52$ ; EmptySp vs T4/T5Sp,  $p = .04$ , Cohen's  $d = .51$ ; T3Sp vs T4/T5Sp,  $p = 1$ , Cohen's  $d = -.004$ ). Graph features and statistical approach are as in **(A)**.
