# Supplementary material for: Columnar neurons support saccadic bar tracking in Drosophila
Source: eLife journal article supplement (doi:10.7554/elife.83656), 2023-04-04
Supplement: supp [file elife-83656-supp-v1.zip › elife_poa_e83656_Figure_4_figure_supplement_3.pdf]

### Figure 4-figure supplement 3

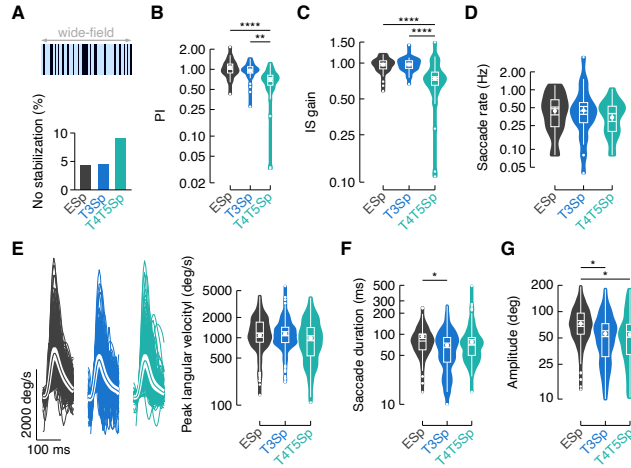

**Figure 4-figure supplement 3.** T3 silencing does not affect the response to the rotation of a wide-field panorama. **(A)** Percentage of trials in which flies did not stabilize the rotating wide-field pattern of random dark and bright stripes. A performance index (PI) was computed as in **Figure 4D**. Bar plot represents the percentage of trials per genotype where the PI was equal or less than 0. **(B)** Violin-box plots of the PI in trials with positive values (y-axis is on a log scale). PI mean for CW and CCW rotating wide-field pattern was computed and a generalized linear model (with gaussian distribution and log link function) was used to fit the data (EmptySp vs T3Sp,  $p = .29$ , Cohen's  $d = .50$ ; EmptySp vs T4/T5Sp,  $p < .0001$ , Cohen's  $d = 1.89$ ; T3Sp vs T4/T5Sp  $p = .001$ , Cohen's  $d = 1.39$ ). Graph features are as in **Figure 4C**. **(C)** Violin-box plots of inter-saccadic (IS) gain defined as in **Figure 4I** (EmptySp vs T3Sp,  $p = 1$ , Cohen's  $d = -.006$ ; EmptySp vs T4/T5Sp,  $p < .0001$ , Cohen's  $d = 2.31$ ; T3Sp vs T4/T5Sp,  $p < .0001$ , Cohen's  $d = 2.32$ ). Graph features and statistical approach are as in **(B)**. **(D)** Violin-box plots of the frequency of optomotor saccades per trial in the three genotypes (y-axis is on a log scale). A generalized linear mixed model (with gamma distribution and log link function) was used to fit the data (EmptySp vs T3Sp,  $p = 1$ , Cohen's  $d = -.04$ ; EmptySp vs T4/T5Sp,  $p = .69$ , Cohen's  $d = .43$ ; T3Sp vs T4/T5Sp,  $p = .57$ , Cohen's  $d = .47$ ). Graph features are as in **Figure 4C**. **(E)** Left: average time-series of the angular velocity during optomotor saccades in the three genotypes. Thin lines represent single saccades. Thick line represents the mean and the white shade around the mean represents s.e.m. Right: violin-box plots of the peak angular velocity during saccades (EmptySp vs T3Sp,  $p = 1$ , Cohen's  $d = -.11$ ; EmptySp vs T4/T5Sp,  $p = 1$ , Cohen's  $d = .19$ ; T3Sp vs T4/T5Sp,  $p = .47$ , Cohen's  $d = .30$ ). Graph features and statistical approach are as in **(D)**. **(F)** Violin-box plots of saccade duration (EmptySp vs T3Sp,  $p = .01$ , Cohen's  $d = .65$ ; EmptySp vs T4/T5Sp,  $p = .21$ , Cohen's  $d = .40$ ; T3Sp vs T4/T5Sp  $p = .85$ , Cohen's  $d = -.24$ ). Graph features and statistical approach are as in **(D)**. **(G)** Violin-box plots of saccade amplitude (EmptySp vs T3Sp,  $p = .04$ , Cohen's  $d = .60$ ; EmptySp vs T4/T5Sp,  $p = .02$ , Cohen's  $d = .64$ ; T3Sp vs T4/T5Sp,  $p = 1$ , Cohen's  $d = .04$ ). Graph features and statistical approach are as in **(D)**.
