# Supplementary material for: Columnar neurons support saccadic bar tracking in Drosophila
Source: eLife journal article supplement (doi:10.7554/elife.83656), 2023-04-04
Supplement: supp [file elife-83656-supp-v1.zip › elife_poa_e83656_Figure_4_figure_supplement_4.pdf]

**Figure 4-figure supplement 4**

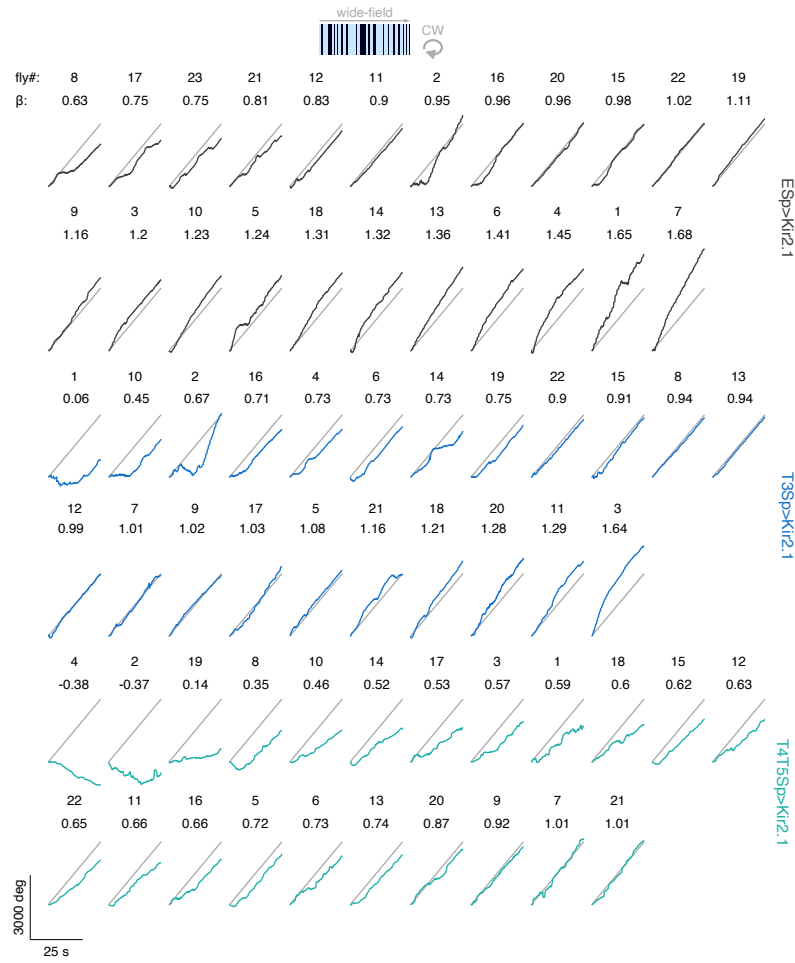

**Figure 4-figure supplement 4.** Raw unwrapped angular distance traveled by the flies during wide-field stabilization. The traces represent the responses per genotype (black: EmptySp>Kir2.1; blue: T3Sp>Kir2.1; green: T4T5Sp>Kir2.1) to a CW rotating wide-field panorama at  $112.5^\circ \text{ s}^{-1}$  for 25 s. Gray line represents the angular displacement traveled by the panorama. The responses within genotype are sorted by the regression coefficient ( $\beta$ ) of a linear fitting to the data.
