# Supplementary material for: Columnar neurons support saccadic bar tracking in Drosophila
Source: eLife journal article supplement (doi:10.7554/elife.83656), 2023-04-04
Supplement: supp [file elife-83656-supp-v1.zip › elife_poa_e83656_Figure_5_figure_supplement_2.pdf]

**Figure 5-figure supplement 2**

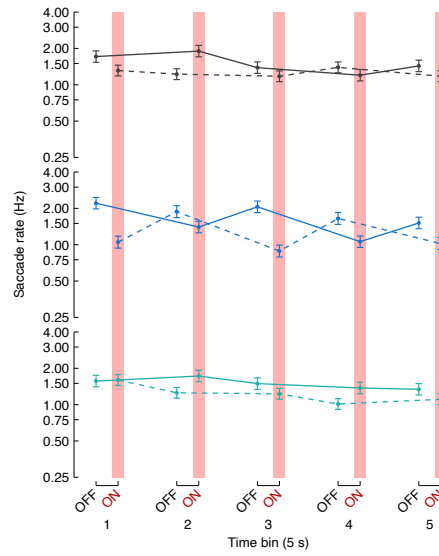

**Figure 5-figure supplement 2.** Frequency of bar tracking saccades per bin of LED OFF or ON (5 progressive bins of 5 s each). Colored dot represents the mean and error bar indicates s.e.m. (y-axis is on a log scale). Lines connected the dots represents saccade frequencies from flies exposed to same sequence of optogenetic stimulation (solid line: OFF-ON-OFF-ON-OFF; dashed line: ON-OFF-ON-OFF-ON). T3Sp>CsChrimson flies starting with LED OFF show already an increased saccade rate that decreases when the LED turns ON.
