# Supplementary material for: Columnar neurons support saccadic bar tracking in Drosophila
Source: eLife journal article supplement (doi:10.7554/elife.83656), 2023-04-04
Supplement: supp [file elife-83656-supp-v1.zip › elife_poa_e83656_Figure_5_figure_supplement_3.pdf]

**Figure 5-figure supplement 3**

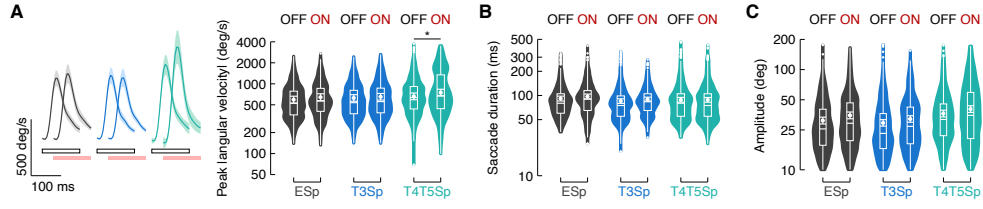

**Figure 5-figure supplement 3.** Saccade dynamics during bar tracking and optogenetic stimulation. **(A)** Left: average angular velocity (mean  $\pm$  s.e.m.) of saccades. Light gray and red horizontal bars at the bottom indicate LED OFF and ON, respectively. Right: violin-box plots of saccade peak angular velocity during periods of LED OFF and ON (y-axis is on a log scale). A generalized linear mixed model (with gamma distribution and log link function) was fitted to the mean values per fly and pairwise post-hoc comparisons using *t*-tests adjusted with Bonferroni method were used to compare the levels of the fixed effect (EmptySp OFF vs ON,  $p = .64$ , Cohen's  $d = -.44$ ; T3Sp OFF vs ON,  $p = 1$ , Cohen's  $d = -.21$ ; T4/T5Sp OFF vs ON,  $p = .02$ , Cohen's  $d = -.69$ ). Graph features are as in **Figure 5E**. **(B)** Violin-box plots of saccade duration during periods of LED OFF and ON (EmptySp OFF vs ON,  $p = .99$ , Cohen's  $d = -.43$ ; T3Sp OFF vs ON,  $p = 1$ , Cohen's  $d = -.34$ ; T4/T5Sp OFF vs ON,  $p = 1$ , Cohen's  $d = .02$ ). Null model was the best model tested. Graph features and statistical approach are as in **(A)**. **(C)** Violin-box plots of saccade amplitude during periods of LED OFF and ON (EmptySp OFF vs ON,  $p = .16$ , Cohen's  $d = -.65$ ; T3Sp OFF vs ON,  $p = .66$ , Cohen's  $d = -.49$ ; T4/T5Sp OFF vs ON,  $p = .39$ , Cohen's  $d = -.56$ ). Graph features and statistical approach are as in **(A)**.
