# Supplementary material for: Columnar neurons support saccadic bar tracking in Drosophila
Source: eLife journal article supplement (doi:10.7554/elife.83656), 2023-04-04
Supplement: supp [file elife-83656-supp-v1.zip › elife_poa_e83656_Figure_6_figure_supplement_2.pdf]

**Figure 6-figure supplement 2**

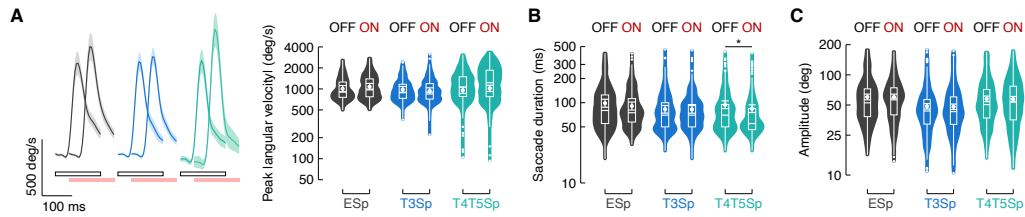

**Figure 6-figure supplement 2.** Saccade dynamics during wide-field stabilization and optogenetic stimulation. **(A)** Left: average angular velocity (mean  $\pm$  s.e.m.) of saccades. Light gray and red horizontal bars at the bottom indicate LED OFF and ON respectively. Right: violin-box plots of saccade peak angular velocity during periods of LED OFF and ON (y-axis is on a log scale). A generalized linear mixed model (with gamma distribution and log link function) was fitted to the data and pairwise post-hoc comparisons using *t*-tests adjusted with Bonferroni method were used to compare the levels of the fixed effect (EmptySp OFF vs ON,  $p = .19$ , Cohen's  $d = -.50$ ; T3Sp OFF vs ON,  $p = 1$ , Cohen's  $d = .30$ ; T4/T5Sp OFF vs ON,  $p = .37$ , Cohen's  $d = -.45$ ). Model with only genotype as fixed effect was better than the one with an interaction between genotype and LED ( $BF_{01} = 2.24$ ). Graph features are as in **Figure 6B**. **(B)** Violin-box plots of saccade duration during periods of LED OFF and ON (EmptySp OFF vs ON,  $p = .32$ , Cohen's  $d = .47$ ; T3Sp OFF vs ON,  $p = 1$ , Cohen's  $d = .02$ ; T4/T5Sp OFF vs ON,  $p = .02$ , Cohen's  $d = .65$ ). Graph features and statistical approach are as in **(A)**. **(C)** Violin-box plots of saccade amplitude during periods of LED OFF and ON (EmptySp OFF vs ON,  $p = 1$ , Cohen's  $d = .01$ ; T3Sp OFF vs ON,  $p = 1$ , Cohen's  $d = .06$ ; T4/T5Sp OFF vs ON,  $p = 1$ , Cohen's  $d = .06$ ). Graph features and statistical approach are as in **(A)**.
