# Supplementary material for: Columnar neurons support saccadic bar tracking in Drosophila
Source: eLife journal article supplement (doi:10.7554/elife.83656), 2023-04-04
Supplement: supp [file elife-83656-supp-v1.zip › elife_poa_e83656_Figure_6_figure_supplement_3.pdf]

### Figure 6-figure supplement 3

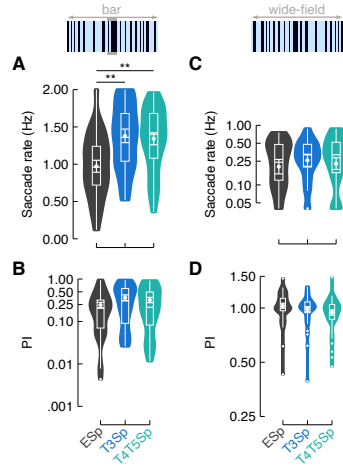

**Figure 6-figure supplement 3.** Saccade rate and performance index in bar tracking and wide-field stabilization in flies expressing CsChrimson. (A) Violin-box plots of the frequency of bar tracking saccades per trial in the three genotypes (black:  $n = 19$  EmptySp>CsChrimson; blue:  $n = 18$  T3Sp>CsChrimson; green:  $n = 19$  T4T5Sp>CsChrimson). Big white dot represents the mean, thin horizontal bars indicate s.e.m. and thick horizontal bar indicates the median. Small white dots on the violin tails represent outliers. A linear mixed model was used to fit the data and pairwise post-hoc comparisons using  $t$ -tests adjusted with Bonferroni method were used to compare the predictions (EmptySp vs T3Sp,  $p = .005$ , Cohen's  $d = -1.07$ ; EmptySp vs T4/T5Sp,  $p = .007$ , Cohen's  $d = -.97$ ; T3Sp vs T4/T5Sp,  $p = 1$ , Cohen's  $d = .10$ ). (B) Violin-box plots of the PI (y-axis is on a log scale) in trials with positive values (greater than 0). PI mean for CW and CCW revolving bars was computed and a generalized linear model (with gamma distribution and log link function) was fitted to the data (EmptySp vs T3Sp,  $p = .18$ , Cohen's  $d = -.56$ ; EmptySp vs T4/T5Sp,  $p = .60$ , Cohen's  $d = -.38$ ; T3Sp vs T4/T5Sp  $p = 1$ , Cohen's  $d = .19$ ). Graph features are as in (A). (C) Violin-box plots of the frequency of optomotor saccades per trial in the three genotypes (y-axis is on a log scale). A generalized linear mixed model (with gamma distribution and log link function) was used to fit the data (EmptySp vs T3Sp,  $p = 1$ , Cohen's  $d = -.46$ ; EmptySp vs T4/T5Sp,  $p = 1$ , Cohen's  $d = -.22$ ; T3Sp vs T4/T5Sp,  $p = 1$ , Cohen's  $d = .24$ ). Graph features are as in (A). (D) Violin-box plots of the PI in trials with positive values (y-axis is on a log scale). PI mean for CW and CCW rotating wide-field pattern was computed and a generalized linear model (with gaussian distribution and log link function) was used to fit the data (EmptySp vs T3Sp,  $p = 1$ , Cohen's  $d = .32$ ; EmptySp vs T4/T5Sp,  $p = .18$ , Cohen's  $d = .64$ ; T3Sp vs T4/T5Sp  $p = 1$ , Cohen's  $d = .32$ ). Graph features are as in (A).
