# Supplementary material for: Columnar neurons support saccadic bar tracking in Drosophila
Source: eLife journal article supplement (doi:10.7554/elife.83656), 2023-04-04
Supplement: supp [file elife-83656-supp-v1.zip › elife_poa_e83656_Figure_7_figure_supplement_1.pdf]

**Figure 7-figure supplement 1**

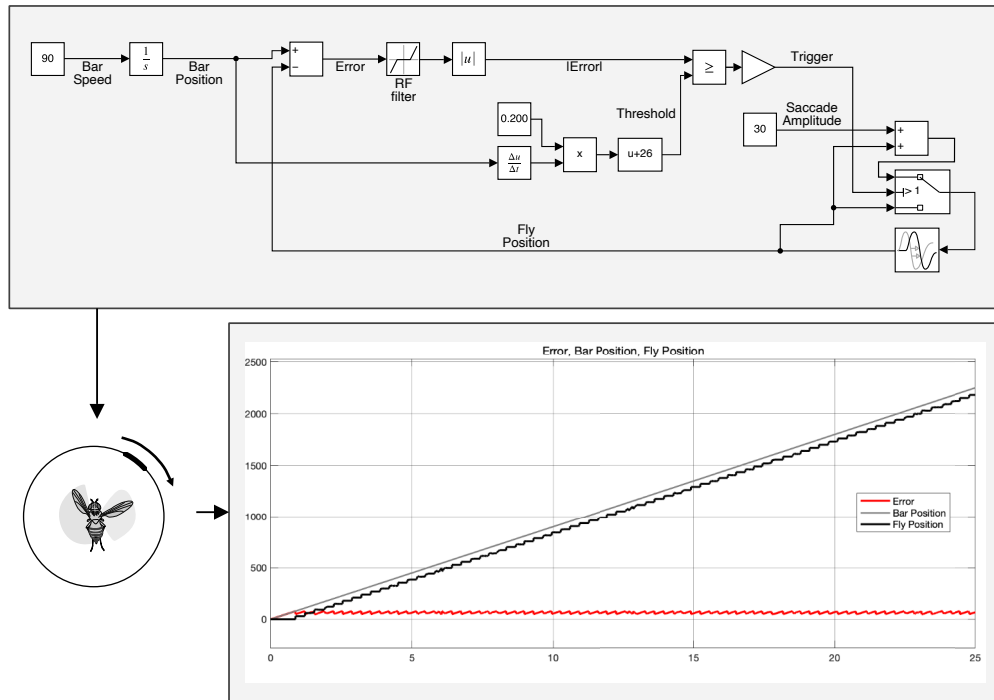

**Figure 7-figure supplement 1.** Control model for triggering saccades. Top: simulink (MATLAB) implementation of the physiologically-inspired model in **Figure 7**. The bar speed ( $90^\circ \text{ s}^{-1}$ ) is integrated over a quite narrow time window ( $\sim 200 \text{ ms}$ ) and the integration starts with a spatial offset with respect to the visual midline ( $\sim 11^\circ$ ). This means that T3 neurons might encode the bar speed and a downstream partner might integrate this information over a selective amount of time, encoding the bar position and triggering a saccade when the amount of calcium reaches a specific threshold. In this model saccade amplitudes are considered a fixed parameter ( $30^\circ$ ) but in an alternative version they could be easily tuned to the bar speed. Bottom: simulation of the fly behavior (angular position) in a bar tracking task according to the control model.
